# Supplementary material
Source: PubMed Central journal article supplement (PMC4249229)
Supplement: AEM.02752-14_zam999105867so1.pdf [file AEM.02752-14_zam999105867so1.pdf]

1 **Supplementary figures**

2

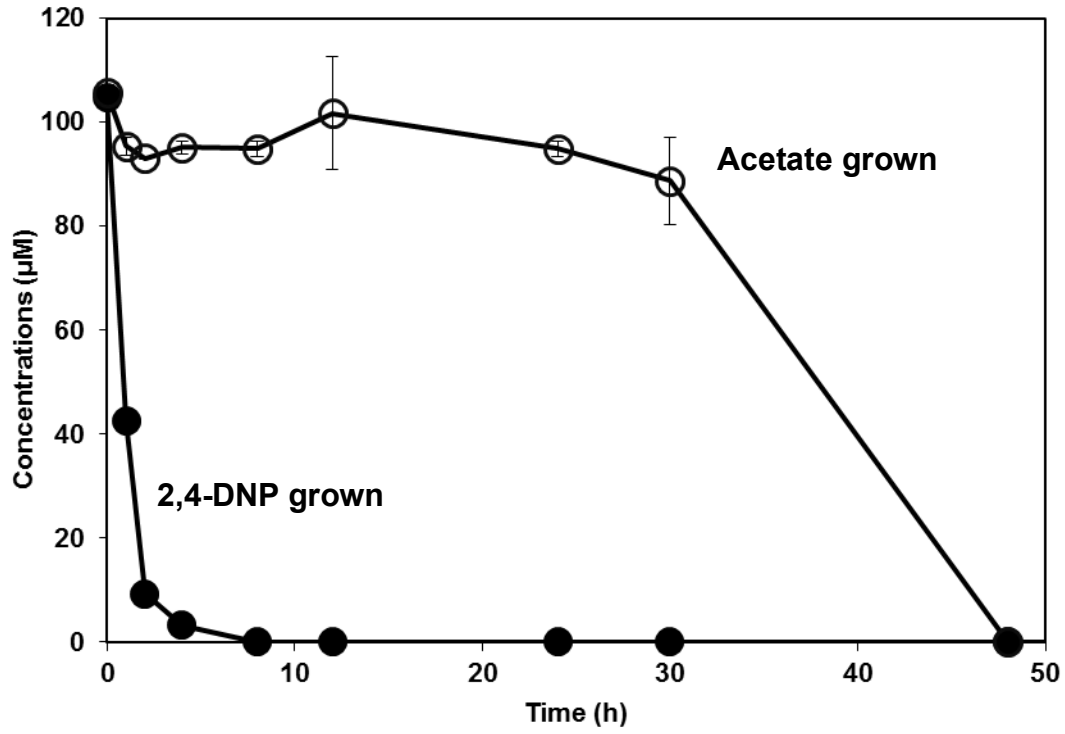

3

4

5 FIG. S1. Biodegradation of 2,4-DNP by *Nocardioides* sp. JS1661 pre-grown on acetate and 2,4-

6 DNP.

7

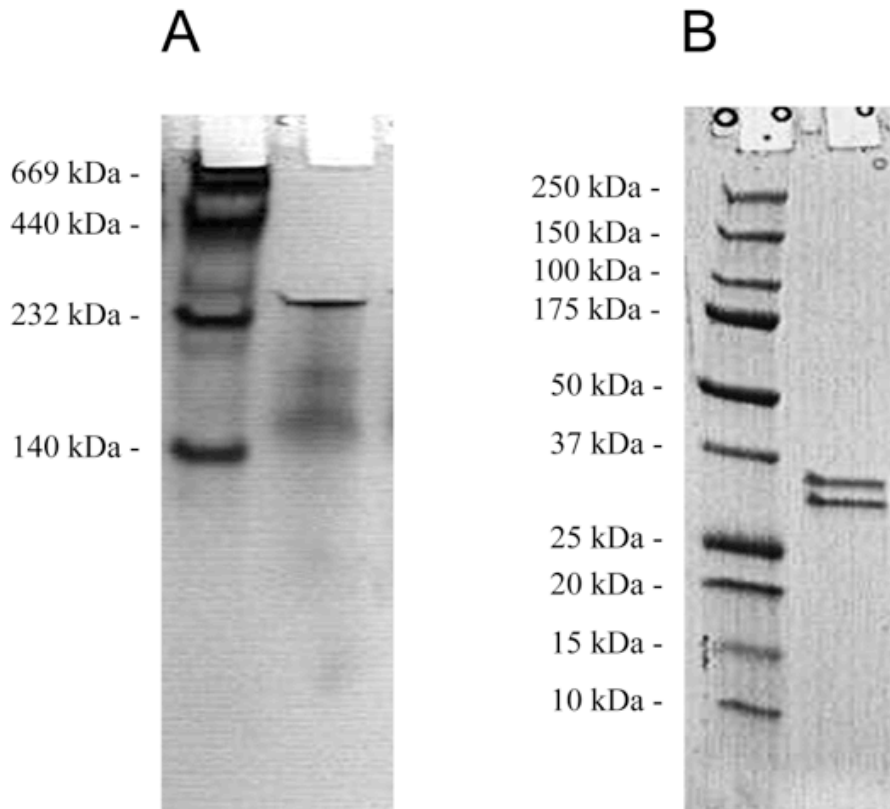

8  
9  
10  
11  
12  
13  
14  
15  
16  
17  
18  
19  
20  
21

FIG. S2. Native gel (A) and denatured SDS-PAGE gel (B) of purified DNAN hydrolase from Source 15 PHE column. The upper band of the denatured SDS-PAGE (36 kDa) represent *dnH1* and the lower band (34 kDa) represent *dnH2*.

22  
23  
24  
25  
26  
27  
28  
29  
30  
31  
32  
33  
34  
35  
36  
37  
38  
39  
40  
41  
42  
43  
44  
45  
46  
47  
48  
49  
50  
51  
52  
53  
54  
55  
56  
57  
58  
59  
60  
61  
62  
63  
64  
65  
66  
67  
68  
69  
70  
71  
72  
73  
74  
75  
76  
77  
78  
79  
80

701 GACACCAGAACTGGACTCGTCGAGCGCGAGACATCGGCGCGGGGCCCCAGGCTGTGCGATCAAAGGAGGCTGATGACCGTGACGAGCCAGACGAGCTC  
· rbs M S V T S Q T S S ·  
· S G S A A V S D C H R G I I D I S G P V P G Y E W E P S M T T E P ·  
801 GAGTGGATCGGCAGCTGTATCCGACTGCCATCGCGGGATTATCGACATCTCTGGGCCGGTGCCGGGTATGAGTGGGAGCCCTCCATGACGACCGAACCG  
· V R G R V W T I T D G V F R T L A I E G D T G V I A V D T F W S P G ·  
·  
901 GTTCGCGCGGGGTGTGGACGATACCCGACGGCGTCTCCGAACGCTTTCGATCGAAGCGACACCCGAGTTCATCGCCGTCGACACCTTCTGGTCCCCGG  
· S A R Q Y R R A L Q S H F P R K P V H T I I Y T H D H L D H T G F ·  
1001 GATCGGCCAGGAGTACCCGACAGCCCTCCAGAGTCACTTTCGCGCAAGCCGGTGACACGATCATCTACCCACGACCACCTCGACCACACTGGCTT  
· G A D F A P D A D Q I L A H E L T A E V I A R R S S D G Q L P A T ·  
1101 TGGAGCCGACTTCGCTCCGATGCCGATCAGATCTTGCACGAGCTACCCGCGAGGTGATCGCCCGCCGAGCTCGGACGGTCAACTCCCGCCACC  
· R T W S G E R L E V S I D G A E F E L I Y P G P T H G T G N T A L Y ·  
·  
1201 AGAACCTGGTCCGGCGAGCGACTCGAAGTTTCCATTGACGGCGCTGAGTTCGAGTGTACTACCCCGGGCCGACCCACGGGACGGGAAACCCGCTTGT  
· F P N E R F L Y M A D T V F T G P T Y N I V P D F L W T S W I P N ·  
1301 ACTTTCCCAACGAGCGGTTCCTCTACATGGCCGACACCGTCTTACCCGGCCGACCTACAACATCGTGCCTGACTTCCTGTGGACGAGTGGATTCTTAA  
· T R R L L G L D W D L Y V P G H F W R L S R R E F E A D F E L W D ·  
1401 CACGCGAGCTGTCTCGGGCTCGACTGGGATCTCTACGTCGCCGGGCATTTCTGGCGGCTTTCGCGCCGAGAGTTCGAGGCCGACTTCGAGCTCTGGAC  
· A T A A C A L D A L R A G V D I D N F A D V K K F T Y E R M D E P F ·  
·  
1501 GCAACAGCGGCTTGCGCCCTCGACGCGCTCCGTGCGGGGGTTCGACATCGACAACCTTCGCTGACGTCAGAAGTTCACCTACGAACGAATGGATGAGCCGT  
· G S R T F R F D E F A A I N V L T H M V H Y Q T G G W G L R D Y E ·  
1601 TCGGTAGCCGGACGTTCCGATTCCGACGAGTTCGCCGCAATTAACGTGCTGACGCACATGGTGCCTACCAGACGGGGGGTGGGGTCTGCGTGACTACGA  
· P Y S N E P F K T T L P Q R L G S P L \* M T G R Q R T T V V A P D R P ·  
1701 GCCGTACTCCAACGAGCCGTTCAAGACCACCTTCCCGCAGCGACTGGGATCGCCGCTGTGACCGCCGGCAGCGCACGAGTGTGCTCCTGACCGAC  
· V Q D A T I S Q L T T R V W T V A I D G Y R T I V V E G E T G I V ·  
1801 CGGTTCCAGGACGCCACGATCAGTCAGCTGACCACAGTGTCTGGACCGTTCGAATCGACGGGTATCGAACGATCGTGTGAGGGCGAGACGGGAATCGT  
· A I N S F G T P S A Q T K Y R E L I T Q T F G D K P V V A V V A S ·  
1901 CGCGATCAACTCGTTCGGAACGCCGTCAGCCGACACCAAGTACCCTGAGCTGATCACTCAGACCTTCGGCGACAAGCCCGTCTGCTGCTGTTGTCGCGTCC  
· I D H L D H T G R L G P F A N G A E V I G H E L G Q A I A F G R G L ·  
2001 ATCGATCATCTCGACCACACCGGACGCCCTCGGCCCTTTGCTAACGGCGCGAAGTGTGCGCCACGAGCTCGGACAGCGATTGCTTTTGGTCCGGAC  
· P E Q K L A D T V V T G P V T E I E R A G V R L V L R Y P A P T V ·  
2101 TACCTGAGCAGAAGCTCGCCGACACTGTTGTGACGGTCCGGTACCCGAGATCGAGCGTGTGGTGTGACTCGTACTGCGGTACCCGGCGCCACCCT  
· G T G N L A V D L P D D D V V F M V G L Q S G A R Y G I F P D F H ·  
2201 CGGCACCGGAAACCTGGCCGTTGACCTCCCGACGACGACGTCGTCTTTCATGGTCCGCTCCAGTCCGGCGCTCGGTACGGCATCTTCCAGACTCCAC  
· F K H F L R A T S E I A A L G R R Y F V P G R S E V M D A G Q V R Q ·  
2301 TTCAAGCACTTCTGCGAGCAACAGTGTGATCGCTGCGCTCGGGCCGGTACTTCGTGCCAGGTCGTTCCGAGTTCATGATGCGGGCCAGGTCCGGC  
· A L E Y V N D F Q N A C Q R C L A G G E V P H W L L E P T T A Y L ·  
2401 AGGCGCTGGAGTATGTGAACGACTTCCAGAACGCTTGTGACGCTGCTCGCGGGTGGCGAGGTCCCGACTGGTGTGAGCCGACAACCGCCTACCT  
· H D E L S S K W S H L E G Y D P V A V G L G G L R V V C H Y Y M G ·  
2501 TCACGATGAGCTCTCCTCGAAGTGGTCCCATCTGGAGGGCTACGATCCGGTGGCCGTCGACTGGGCGGGTTCGGGTTGTGTGCCACTACTACATGGGT  
· G W W L D D T D H H E L L Y D H L T V R T Y R E Y R E R L A T A G T ·  
2601 GGGTGGTGGCTCGACGACTGACCATCAGAGTGTCTACGACCACCTCACCGTGGCGACCTACCGGAGTACCGGAAACGCTTGGCAACTGCAGGA  
· G R A \* ·  
2701 CCGGCCGAGCTGGAAGGCCCTAAAGAAGTCCGCGGATCGGGAGGAGTTTCACTGATGACGACCGTTCGACCGCTGGTTCATCGGCGGGGTCCACCA

91 FIG. S3. DNA sequence of the DNAN hydrolase genes indicating ribosomal binding site (RBS),  
92 putative start/stop codons and the positions of the N-terminal peptide sequences. The proteins  
93 designated “upper band” in the text corresponds to nucleotides 775-1762 and the “lower band”  
94 corresponds to 1759-2715. The matched peptides for the upper and lower bands cover 37%  
95 (122/329 AA's) and 55% (178/319 AA's) of the proteins, respectively. Covered amino acids  
96 (shown in red) include 113 from peptide sequencing and 6 from N-terminal sequencing (yellow  
97 highlighted) for the upper band and 172 from peptide sequencing and 6 from N-terminal  
98 sequencing for the lower band. Based on the N-terminal threonine, the first nine amino acids  
99 (marked in blue), seem to have been post-translationally removed by an unknown mechanism from  
100 the upper and the first amino acid (methionine, encoded by GTG: marked in blue), seems to have  
101 been post-translationally removed by the universal N-terminal methionine excision mechanism  
102 from the lower band.
